# Supplementary material
Source: PubMed Central journal article supplement (PMC4247350)
Supplement: NIHMS601211-supplement-01.pdf [file NIHMS601211-supplement-01.pdf]

## Heritability of Subcortical and Limbic Brain Volume and Shape in Multiplex-Multigenerational Families with Schizophrenia

### *Supplemental Information*

**Table S1.** Sample size by group for each region of interest

| <b>ROI</b>  | <b>Hemisphere</b> | <b><i>n</i></b> | <b>HC</b> | <b>SZ</b> | <b>FAM</b> |
|-------------|-------------------|-----------------|-----------|-----------|------------|
| Accumbens   | L                 | 423             | 241       | 32        | 150        |
|             | R                 | 427             | 244       | 32        | 151        |
| Amygdala    | L                 | 427             | 244       | 33        | 150        |
|             | R                 | 424             | 242       | 33        | 149        |
| Caudate     | L                 | 428             | 243       | 32        | 153        |
|             | R                 | 429             | 246       | 33        | 150        |
| Hippocampus | L                 | 428             | 244       | 31        | 153        |
|             | R                 | 429             | 244       | 33        | 152        |
| Pallidum    | L                 | 422             | 241       | 31        | 150        |
|             | R                 | 421             | 242       | 29        | 150        |
| Putamen     | L                 | 428             | 244       | 33        | 148        |
|             | R                 | 425             | 244       | 33        | 151        |
| Thalamus    | L                 | 429             | 245       | 32        | 151        |
|             | R                 | 427             | 246       | 32        | 149        |

FAM, multiplex family members; HC, healthy comparison subject; L, left; *n*, sample size after region specific exclusions; R, right; ROI, region of interest; SZ, patients with schizophrenia.
